# Supplementary material for: Direct observation of structural and defect evolution in C-rich SiC using in situ helium ion microscopy
Source: Royal Society of Chemistry journal article supplement (doi:10.1039/c5nr06659j), 2015-11-30
Supplement: c5nr06659j1.pdf [file c5nr06659j1.pdf]

## Supplementary materials

### Figures

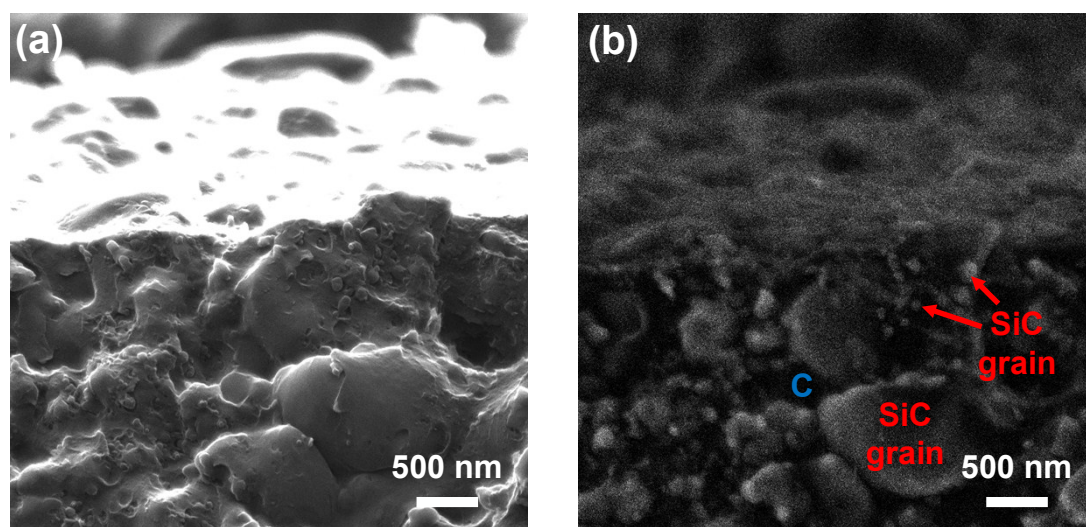

Fig.1 (a) SE and (b) RBE images of C-rich SiC under HIM.

### Videos

Video 1 Microstructural evolutions of micron-/nano-SiC grains and excess carbon under in-situ HIM.

Video 2 Helium cavities evolution at carbon interphase between SiC bi-grains under in-situ HIM.
